1 **Title:** Informal genomic surveillance of regional distribution of *Salmonella* Typhi genotypes  
2 and antimicrobial resistance via returning travellers

3

#### 4 **Authors and Affiliations**

5 Danielle J. Ingle<sup>1,2\*</sup>, Satheesh Nair<sup>3</sup>, Hassan Hartman<sup>3</sup>, Philip M. Ashton<sup>3</sup>, Zoe A. Dyson<sup>4,5</sup>,  
6 Martin Day<sup>3</sup>, Joanne Freedman<sup>7</sup>, Marie A. Chattaway<sup>3</sup>, Kathryn E. Holt<sup>5,6†</sup>, Timothy J.  
7 Dallman<sup>3†</sup>

8

9 \* corresponding author: DJI. Email: [danielle.ingle@anu.edu.au](mailto:danielle.ingle@anu.edu.au)

10 † These authors contributed equally to this publication

11

12 1 National Centre for Epidemiology and Population Health, The Australian National  
13 University, Canberra, Australia

14 2 Microbiological Diagnostic Unit Public Health Laboratory, Department of Microbiology and  
15 Immunology, The University of Melbourne at The Peter Doherty Institute for Infection and  
16 Immunity, Melbourne, Australia

17 3 Bacteriology Reference Department, National Infection Service, Public Health England, 61  
18 Colindale Avenue, London NW9 5EQ, UK

19 4 Department of Medicine, School of Clinical Medicine, University of Cambridge, Cambridge,  
20 United Kingdom

21 5 Department of Biochemistry and Molecular Biology, Bio21 Molecular Science and  
22 Biotechnology Institute, University of Melbourne, Parkville, Victoria 3010, Australia

23 6 London School of Hygiene and Tropical Medicine, Keppel Street, London WC1E 7HT, UK

24 7 Travel Migrant and Health Department, Public Health England, 61 Colindale Avenue,  
25 London NW9 5EQ, UK

26 **Abstract**

27 *Salmonella enterica* serovar Typhi (S. Typhi) is the causative agent of typhoid fever, a  
28 systemic human infection with a burden exceeding 20 million cases each year that occur  
29 disproportionately among children in low and middle income countries. Antimicrobial therapy  
30 is the mainstay for treatment, but resistance to multiple agents is common. Here we report  
31 genotypes and antimicrobial resistance (AMR) determinants detected from routine whole-  
32 genome sequencing (WGS) of 533 S. Typhi isolates referred to Public Health England  
33 between April 2014 and April 2017, 488 (92%) of which had accompanying patient travel  
34 information obtained via an enhanced surveillance questionnaire. The majority of cases  
35 involved S. Typhi 4.3.1 (H58) linked with travel to South Asia (58%). Travel to East and West  
36 Africa were associated with genotypes 4.3.1 and 3.3.1, respectively. Point mutations in the  
37 quinolone resistance determining region (QRDR), associated with reduced susceptibility to  
38 fluoroquinolones, were very common (85% of all cases) but the frequency varied  
39 significantly by region of travel: 95% in South Asia, 43% in East Africa, 27% in West Africa.  
40 QRDR triple mutants, resistant to ciprofloxacin, were restricted to 4.3.1 lineage II and  
41 associated with travel to India, accounting for 23% of cases reporting travel to the country.  
42 Overall 24% of isolates were MDR, however the frequency varied significantly by region and  
43 country of travel: 27% in West Africa, 52% in East Africa, 55% in Pakistan, 24% in  
44 Bangladesh, 3% in India. MDR determinants were plasmid-borne (InCHI1 PST2 plasmids) in  
45 S. Typhi 3.1.1 linked to West Africa, but in all other regions MDR was chromosomally  
46 integrated in 4.3.1 lineage I. We propose that routine WGS data from travel-associated  
47 cases in industrialised countries could serve as informal sentinel AMR genomic surveillance  
48 data for countries where WGS is not available or routinely performed.

49

50

## 51 **Author Summary**

52 Our data demonstrate how routine WGS data produced by Public Health England can be  
53 further mined for informal passive surveillance of *Salmonella* Typhi circulating in different  
54 geographical regions where typhoid is endemic. We have shown the public health utility of a  
55 simplified approach to WGS reporting based on the GenoTyphi genotyping framework and  
56 nomenclature, which doesn't require the generation of a phylogenetic tree or other  
57 phylogenetic analysis. These approaches yielded results consistent with previously reported  
58 antimicrobial resistance (AMR) patterns of *S. Typhi*, including prevalence of multi-drug  
59 resistant (MDR) and fluoroquinolone resistance in different regions in association with  
60 different pathogen variants. These data provide a rationale and framework for the extraction  
61 and reporting of geographically stratified genotype and AMR data from public health labs in  
62 non-endemic countries. Prospective analysis and reporting of such data could potentially  
63 detect shifts in regional *S. Typhi* populations, such as replacement or spread of different  
64 subclades and the emergence and dissemination of MDR, fluoroquinolone resistant and/or  
65 extensively drug resistant *S. Typhi*, providing valuable data to inform typhoid control  
66 measures in low and middle income countries that are still building their genomics capacity.

67

## 68 **Introduction**

69 *Salmonella enterica* serovar Typhi (*S. Typhi*) is the causative agent of typhoid fever[1], a  
70 systemic human infection responsible for an estimated 223,000 deaths each year resulting  
71 from more than 20 million infections[2,3]. The majority of the disease burden falls on children  
72 in low and middle income countries (LMICs)[2], however vaccination programmes are rare in  
73 endemic countries and antimicrobial therapy is considered crucial for the safe clearance of *S.*  
74 *Typhi* infections and the avoidance of clinical complications. Historically typhoid fever could  
75 be effectively treated using first-line drugs including chloramphenicol, ampicillin or co-  
76 trimoxazole, however the emergence of multi-drug resistant (MDR) *S. Typhi*, defined as  
77 displaying resistance to all three drugs, in the late 1980s and early 1990s resulted in

78 changes to treatment guidelines, with fluoroquinolones becoming the recommended  
79 therapy[4-7]. Recent years have seen a rise in the proportion of *S. Typhi* disease isolates  
80 displaying reduced susceptibility to fluoroquinolones associated with point mutations in  
81 quinolone resistance determining region (QRDR) of *gyrA* and *parC*[2,8,9].  
82  
83 *S. Typhi* is genetically monomorphic, which has historically constrained molecular  
84 surveillance of *S. Typhi* before the era of high throughput whole genome sequencing  
85 (WGS)[5,10]. A phylogenetically informative genotyping scheme, GenoTyphi, was recently  
86 introduced to facilitate the interpretation of *S. Typhi* WGS data[11]. Application of the  
87 scheme to a global collection of isolates from >60 countries showed that the *S. Typhi*  
88 population is highly structured, comprising dozens of subclades associated with specific  
89 geographical regions[11,12]. This global genomic framework for *S. Typhi* revealed the  
90 majority of MDR *S. Typhi* infections worldwide are associated with a single phylogenetic  
91 lineage, designated as genotype 4.3.1 (H58 under the legacy scheme[5]), which has  
92 disseminated from South Asia since the 1990s, including into East Africa [11,12].  
93 Contrastingly, in West Africa MDR *S. Typhi* is associated with a different genotype,  
94 3.1.1[13,14]. The MDR phenotype in both *S. Typhi* 4.3.1 and 3.1.1 is encoded by a  
95 composite transposon carrying genes conferring resistance to five drug classes. These  
96 include chloramphenicol, penicillins and co-trimoxazole and the determinants are typically  
97 located on IncH1 plasmids (plasmid sequence type PST6 in 4.3.1, and PST2 in 3.1.1) [4,12-  
98 17]. Recently, migration of the MDR transposon to the *S. Typhi* chromosome via IS1  
99 transposition has been reported, with four different integration sites identified in the *S. Typhi*  
100 4.3.1 strain background (*fbp*, *yidA*, STY4438 and the intergenic region between *cyaA* and  
101 *cyaY*)[12,18-21].  
102  
103 Resistance to newer agents is also on the rise in *S. Typhi*. Reduced susceptibility to  
104 fluoroquinolones via QRDR mutations is commonly observed amongst *S. Typhi* 4.3.1[12],  
105 especially lineage II[16,22], but is rare in 3.1.1 and other genotypes[12,13]. *S. Typhi* 4.3.1

106 QRDR triple mutants (carrying two mutations in *gyrA* and one in *parC*) displaying complete  
107 resistance to ciprofloxacin are increasing in prevalence in South Asia[23]. WGS analysis  
108 showed that recent treatment failure with gatifloxacin in Nepal resulted from introduction of a  
109 4.3.1 lineage II triple mutant from India, prompting a reconsideration of the reliance on  
110 fluoroquinolones in the region[8,22]. Subsequently an outbreak of *S. Typhi* 4.3.1 displaying  
111 resistance to ceftriaxone in addition to ciprofloxacin and all three first line drugs was reported  
112 in Pakistan[24,25]. The outbreak strain carried both the MDR composite transposon  
113 integrated in the chromosome at *yidA*, and an *E. coli* IncY plasmid harbouring the extended  
114 spectrum beta-lactamase (ESBL) gene *bla*<sub>CTX-M-15</sub> (conferring resistance to ceftriaxone and  
115 other third generation cephalosporins) and the quinolone resistance gene *qnrS* (which  
116 combined with a *gyrA*-S83F mutation in the chromosome conferred resistance to  
117 ciprofloxacin)[24]. This strain has been designated XDR (extensively drug resistant, defined  
118 as resistance to chloramphenicol, penicillins, co-trimoxazole, ceftriaxone and ciprofloxacin)  
119 and severely limits treatment options, with azithromycin being the last remaining oral  
120 antibiotic (to which sporadic resistance has already been observed in South Asia)[7].

121

122 These dynamic trends highlight a need for prospective AMR surveillance in global *S. Typhi*  
123 populations, in order to inform empirical treatment options; genomic surveillance offers the  
124 added benefit of revealing resistance mechanisms and regional and international spread of  
125 emerging MDR and XDR strains[26]. Blood culture confirmation and isolate characterisation  
126 is a pre-requisite for such activities, but neither are routinely performed in laboratories in  
127 areas where typhoid fever is endemic. However, in many developed nations, *S. Typhi*  
128 infections are notifiable and the disease is primarily associated with travellers returning from  
129 high-risk regions[27], providing an opportunity for informal sentinel surveillance of those  
130 regions. In England, typhoid fever is notifiable and all *S. Typhi* isolates are sent to Public  
131 Health England (PHE) for confirmation and characterisation via WGS, and recent travel  
132 history is sought via enhanced surveillance questionnaires. Most cases identified in England  
133 (~80%) are associated with recent travel to typhoid endemic areas[27]. We recently reported

134 that the geographic origin of travel-associated *S. Typhi* cases in London could be predicted  
135 by comparing WGS data to the global framework[11], and identified the first case of ESBL *S.*  
136 *Typhi* in England from a patient with travel to Pakistan[28], supporting the notion that WGS  
137 data on travel-associated cases has sentinel surveillance value. Here we analysed WGS  
138 data from *S. Typhi* isolates referred to PHE from three years of national surveillance  
139 between April 2014 and April 2017[29], and explored the distribution of lineages and AMR  
140 determinants in geographic regions frequented by UK travellers.

141

## 142 **Methods**

### 143 **Bacterial isolates included in this study**

144 A total of 533 *S. Typhi* isolates from English cases received by PHE during the period of 1<sup>st</sup>  
145 April 2014 to 31<sup>st</sup> March 2017 were included in this study. Patient travel information was  
146 available for 488/533 of the isolates and was obtained by PHE using an enhanced  
147 surveillance questionnaire ([https://www.gov.uk/government/publications/typhoid-and-](https://www.gov.uk/government/publications/typhoid-and-paratyphoid-enhanced-surveillance-questionnaire)  
148 [paratyphoid-enhanced-surveillance-questionnaire](https://www.gov.uk/government/publications/typhoid-and-paratyphoid-enhanced-surveillance-questionnaire)), this included questions pertaining to the  
149 destination of any foreign travel that occurred during the likely incubation period (28 days  
150 before onset of symptoms). For the remaining 45 isolates, no enhanced surveillance  
151 questionnaire was completed or the data collected was incomplete; these were spread  
152 across the four years (n = 15 for 2014, n = 24 for 2015, n = 4 for 2016 and n = 2 for 2017;  
153 mean 8.5%). Details of all 533 isolates are provided in **S1 Table**.

154

### 155 **Whole genome sequencing**

156 WGS was conducted as part of routine sequencing of all *Salmonella* isolates referred to the  
157 Gastrointestinal Bacteria Reference Unit at PHE, as previously described[29]. Briefly, DNA  
158 was fragmented and tagged for multiplexing with NexteraXT DNA Sample Preparation Kits  
159 (Illumina) and sequenced at PHE on a HiSeq 2500 yielding 100 bp paired end reads.  
160 FASTQ data is available from the NCBI Short Read Archive, BioProject accession

161 PRJNA248792. Individual accession numbers for isolates analysed in this study are given in

162 **S1 Table.**

163

### 164 **Single nucleotide variant (SNV) analysis and *in silico* genotyping**

165 Paired end Illumina reads were mapped to the CT18 reference genome (accession  
166 AL513382)[30], which is the standard reference for *S. Typhi* genomic studies, using RedDog  
167 (V1.beta10.3) available at (<https://github.com/katholt/RedDog>). Briefly, RedDog maps reads  
168 to the reference genome using Bowtie2 (v.2.2.9)[31], before using SAMtools (v1.3.1)[32] to  
169 identify high quality single nucleotide variant (SNV) calls as previously described[19]. A core  
170 SNV alignment was generated for all SNV loci with consensus base calls (phred score >20)  
171 in >95% of genomes; this alignment was filtered to exclude SNVs in phage regions and  
172 repetitive sequences (354 kb; ~7.4% of bases in the CT18 reference chromosome as  
173 defined previously[10]; **S2 Table**) and recombinant regions identified by Gubbins[33]. The  
174 resulting alignment of 8053 SNVs was used as input to RAxML (v8.2.8) to infer a maximum  
175 likelihood (ML) phylogeny with a generalised time-reversible model and a Gamma  
176 distribution to model site-specific rate variation (GTR+  $\Gamma$  substitution model; GTRGAMMA in  
177 RAxML), and 100 bootstrap pseudo-replicates to assess branch support.

178

179 Genotypes were inferred for all isolates by screening the Bowtie2 alignment (bam) files for  
180 SNVs used in the extended *S. Typhi* typing framework, GenoTyphi (code available at  
181 <https://github.com/katholt/genotypphi>)[11]. GenoTyphi uses 72 specific SNVs to assign  
182 isolates to one of four primary clusters; 16 clades; and 49 subclades[11], with the globally  
183 disseminated 4.3.1 (H58) subclade further delineated into lineages I and II (4.3.1.1 and  
184 4.3.1.2).

185

### 186 ***In silico* characterisation of AMR associated genes and mobile elements**

187 *S. Typhi* genomes were screened for acquired AMR genes and plasmid replicons using  
188 PHE's Genefinder pipeline as previously described[34]. Reference sequences in Genefinder  
189 were curated from those described in Comprehensive Antimicrobial Resistance Database[35]  
190 and PlasmidFinder[36]. Genes were called as present within a genome when detected with  
191 100% coverage and >90% nucleotide identity to the reference gene. Genefinder was also  
192 used to detect point mutations in the QRDR of chromosomal genes *gyrA* (codons 83, 87)  
193 and *parC* (codons 79, 80, 84)[37,38]. Isolates were defined as being MDR if genes were  
194 detected by Genefinder in the Beta-Lactamases, Trimethoprim, Sulphonamides and  
195 Chloramphenicol classes.

196  
197 ISmapper[39] (v2) was run with default parameters to screen all read sets for insertion sites  
198 of the transposase IS1 (accession X52534) relative to the CT18 reference chromosome  
199 sequence (accession AL513382). The binary data from ISmapper was processed in R using  
200 tidyverse (v1.2.1) (<https://CRAN.R-project.org/package=tidyverse>). For six isolates that  
201 carried MDR genes but no plasmid replicon genes, ISMapper was re-run with the minimum  
202 read depth threshold reduced to 1 read (from the default of 6 reads), in order to increase  
203 sensitivity to detect the associated IS1 site. This identified IS1 sites in five of the six isolates  
204 (SRR3049053, SRR5989319, SRR1967049, SRR5500465 and SRR5500455) but not in  
205 isolate SRR5500435.

206  
207 The presence and subtypes of IncHI1 and IncN plasmids was further investigated using  
208 plasmid MLST (pMLST). Publicly available pMLST schemes for IncHI1[40] and IncN[41],  
209 available at <https://pubmlst.org/plasmid/>, were used to screen the relevant read sets using  
210 SRST2 (v0.1.8)[42]. The five isolates that were determined to have pST2 versions of the  
211 IncHI1 plasmid were then mapped to the reference genome of plasmid pAKU1 (accession  
212 AM412236) with RedDog along with a pST1 plasmid sequence (pUI1203\_01 accession  
213 ERR340785) from *S. Typhi* strain UI1203 (genotype 3.2.1, isolated from Laos in 2001)[11]  
214 as an outgroup for phylogenetic tree rooting. The resulting SNV alignment was filtered to



215 exclude non-backbone regions of the plasmid (66,458 bp), sites present in <95% of plasmid  
216 sequences, and recombinant regions detected by Gubbins (v2.3.2), resulting in a final  
217 alignment of 17 SNVs for phylogenetic inference as above.

218

219 Genomes with less common AMR profiles were assembled using Unicycler v0.4.6 [43]. The  
220 assemblies were further interrogated for the presence of plasmid replicon genes using  
221 ABRicate (<https://github.com/tseemann/abricate>) and the PlasmidFinder database using a  
222 minimum coverage and minimum identity of 90. The location of AMR genes detected, IS1  
223 sequences and IncHI1 plasmid backbone genes was visualised in Bandage v0.8.1 [44].

224

225 Trees annotated with MDR, IS1 insertion sites, plasmid replicons and QRDR point mutations  
226 were visualised using ggtree v1.8.1[45]. An interactive version of the *S. Typhi* ML phylogeny  
227 with associated metadata is found at microreact ([https://microreact.org/project/r1njJ\\_qJ4](https://microreact.org/project/r1njJ_qJ4) ).

228

## 229 **Ciprofloxacin susceptibility phenotyping**

230 The minimum inhibitory concentration (MIC) of ciprofloxacin was measured for 173 isolates  
231 (n = 117 in 2015 and n = 56 from 2016) as part of a previously reported study[37]. Briefly,  
232 MIC was determined by agar dilution using Mueller-Hinton agar, and *S. Typhi* were  
233 interpreted as displaying resistance (MIC  $\geq 0.5$   $\mu\text{g/mL}$ ) or susceptibility to ciprofloxacin (MIC  
234  $< 0.06$   $\mu\text{g/mL}$ ), according to the EUCAST guidelines (v7.1)[37]. For the 173 phenotyped  
235 isolates, the total number of QRDR mutations per isolate was plotted against the reported  
236 MIC, in R using ggplot2 (v3.0.0)[46].

237

## 238 **Results**

### 239 **Countries of travel**

240 A total of 533 *S. Typhi* isolates were referred from English cases to PHE during the three-  
241 year period between April 2014 and April 2017 (n=178, n=176, n=179 in each year running

242 from April to March; listed in **S1 Table**). Of these, 449 cases (84.2%) reported recent foreign  
 243 travel (within 28 days of onset of symptoms), spanning 26 countries. A further 39 cases  
 244 (7.3%) reported no travel abroad. The proportion of cases reporting no recent travel, which  
 245 may represent local transmission within the UK, displayed a non-significant increase from  
 246 5.6% in the first year to 8.9% in the third year ( $p=0.5$  using Chi-squared trend test). No  
 247 information on travel was available for the remaining 45 cases (8.4%). The distribution of  
 248 travel destinations for the cases with known travel history are given in **Table 1** and **Fig. 1**.  
 249 The majority of cases ( $n=387$ , 73%) reported travel to South Asia, particularly India (36%),  
 250 Pakistan (29%) and Bangladesh (6%), reflecting travel and migration patterns between  
 251 England and typhoid endemic areas. Annual case numbers from India and Bangladesh were  
 252 constant (mean 64 and 11 per year, respectively;  $p=0.2$  in each case using Chi-squared  
 253 trend test), but case numbers from Pakistan spiked significantly in the third year of the study,  
 254 to  $n=68$  (38% of total cases) compared to  $n=45$  and  $n=43$  (25%) in the first two years  
 255 ( $p=0.01$  using Chi-squared trend test). Small numbers of cases reported travel to South East  
 256 Asia ( $n=10$ , 2%), East Africa ( $n=21$ , 4%), West Africa ( $n=11$ , 2%) and the Middle East ( $n=4$ ,  
 257 1%; see **Table 1**). Five cases (1%) had reported travel to Europe or North America or South  
 258 America only.

259 **Table 1: Summary table of *S. Typhi* collection**

| Country                | Total | 4.3.1 (%)   | MDR (%)    | Number of QRDR mutations |                |            |
|------------------------|-------|-------------|------------|--------------------------|----------------|------------|
|                        |       |             |            | None (%)                 | One or two (%) | Three (%)  |
| <b>South Asia</b>      |       |             |            |                          |                |            |
| Afghanistan            | 1     | 1 (100%)    | 1 (100%)   | 0 (0%)                   | 1 (100%)       | 0 (0%)     |
| Bangladesh             | 33    | 17 (51.5%)  | 8 (24.2%)  | 2 (6.1%)                 | 31 (93.9%)     | 0 (0%)     |
| India                  | 191   | 151 (79.1%) | 6 (3.1%)   | 5 (2.6%)                 | 143 (74.9%)    | 43 (22.5%) |
| Nepal                  | 3     | 1 (33.3%)   | 0 (0%)     | 1 (33.3%)                | 1 (33.3%)      | 1 (33.3%)  |
| Pakistan               | 156   | 143 (91.7%) | 85 (54.4%) | 10 (6.4%)                | 140 (89.7%)    | 6 (3.9%)   |
| <b>South East Asia</b> |       |             |            |                          |                |            |
| Indonesia              | 3     | 0 (0%)      | 0 (0%)     | 3 (100%)                 | 0 (0%)         | 0 (0%)     |
| Malaysia               | 1     | 1 (100%)    | 0 (0%)     | 0 (0%)                   | 1 (100%)       | 0 (0%)     |

|                      |    |            |           |            |            |          |
|----------------------|----|------------|-----------|------------|------------|----------|
| Myanmar              | 2  | 1 (50%)    | 0 (0%)    | 0 (0%)     | 2 (100%)   | 0 (0%)   |
| Philippines          | 4  | 0 (0%)     | 0 (0%)    | 4 (100%)   | 0 (0%)     | 0 (0%)   |
| <b>Middle East</b>   |    |            |           |            |            |          |
| Iraq                 | 3  | 1 (33.3%)  | 0 (0%)    | 2 (66.7%)  | 1 (33.3%)  | 0 (0%)   |
| UAE                  | 1  | 1 (100%)   | 1 (100%)  | 0 (0%)     | 1 (100%)   | 0 (0%)   |
| <b>East Africa</b>   |    |            |           |            |            |          |
| Ethiopia             | 1  | 0 (0%)     | 0 (0%)    | 1 (100%)   | 0 (0%)     | 0 (0%)   |
| Mozambique           | 1  | 1 (100%)   | 1 (100%)  | 1 (100%)   | 0 (0%)     | 0 (0%)   |
| Rwanda               | 1  | 1 (100%)   | 0 (0%)    | 0 (0%)     | 1 (100%)   | 0 (0%)   |
| Tanzania             | 4  | 4 (100%)   | 2 (50%)   | 2 (50%)    | 2 (50%)    | 0 (0%)   |
| Uganda               | 4  | 4 (100%)   | 0 (0%)    | 0 (0%)     | 4 (100%)   | 0 (0%)   |
| Zimbabwe             | 10 | 8 (80%)    | 8 (80%)   | 8 (80%)    | 2 (20%)    | 8 (80%)  |
| <b>West Africa</b>   |    |            |           |            |            |          |
| Angola               | 2  | 0 (0%)     | 0 (0%)    | 2 (100%)   | 0 (0%)     | 0 (0%)   |
| Ghana                | 2  | 0 (0%)     | 1 (50%)   | 2 (100%)   | 0 (0%)     | 0 (0%)   |
| Nigeria              | 6  | 0 (0%)     | 2 (33.3%) | 3 (50%)    | 3 (50%)    | 0 (0%)   |
| Sierra Leone         | 1  | 0 (0%)     | 0 (0%)    | 1 (100%)   | 0 (0%)     | 0 (0%)   |
| <b>Other Regions</b> |    |            |           |            |            |          |
| China                | 1  | 0 (0%)     | 0 (0%)    | 0 (0%)     | 1 (100%)   | 0 (0%)   |
| Egypt                | 1  | 0 (0%)     | 0 (0%)    | 0 (0%)     | 1 (100%)   | 0 (0%)   |
| Greece               | 1  | 0 (0%)     | 0 (0%)    | 0 (0%)     | 1 (100%)   | 0 (0%)   |
| Peru                 | 1  | 0 (0%)     | 0 (0%)    | 0 (0%)     | 1 (100%)   | 0 (0%)   |
| USA                  | 1  | 0 (0%)     | 0 (0%)    | 1 (100%)   | 0 (0%)     | 0 (0%)   |
| <b>No Travel</b>     | 39 | 15 (38.5%) | 5 (12.8%) | 19 (48.7%) | 18 (46.2%) | 2 (5.1%) |
| <b>Unknown</b>       | 45 | 30 (66.7%) | 9 (20%)   | 9 (20%)    | 32 (71.1%) | 4 (8.9%) |

260 UAE: United Arab Emirates

261 MDR: Multi-drug resistance

262 QRDR: Quinolone resistance determining region

263

264 **Fig. 1. Summary of S. Typhi received at Public Health between April 2014 to March**

265 **2017**

266 a) Map highlighting countries that were reported as travel destinations for patients from  
267 which *S. Typhi* cultures were collected. Countries are coloured by major geographical  
268 regions. b) Number of *S. Typhi* isolates reporting travel to each country over the three-year  
269 period of study, stratified by date of receipt at PHE.

270

### 271 ***S. Typhi* genotypes by region**

272 The 533 genomes were assigned to 31 unique *S. Typhi* genotypes using the GenoTyphi  
273 scheme (**Fig. 2**). The majority (n=391, 73.4%) belonged to subclade 4.3.1 (H58), which was  
274 identified in cases with travel to 15 different countries. Genotype 4.3.1 dominated amongst  
275 cases with reported travel to the South Asian countries associated with the greatest burden  
276 of travel-related cases (India, 79% 4.3.1; Pakistan, 92% 4.3.1; Bangladesh, 52% 4.3.1), and  
277 amongst cases with travel to East Africa (86% 4.3.1; see **Table 1**). Of the 4.3.1 isolates, 162  
278 (41%) were further classified to lineage I (4.3.1.1), including 66% of the 4.3.1 isolates from  
279 cases with travel to Pakistan, 94% of those with travel to Bangladesh, and all 4.3.1 isolates  
280 from cases with travel to Mozambique, Tanzania and Zimbabwe (total n=13). In contrast,  
281 lineage II (4.3.1.2) accounted for 156 (40%) of 4.3.1 genotypes, dominating in returning  
282 travellers to India (75% of 4.3.1 isolates) and accounting for the three 4.3.1 isolates  
283 associated with travel to Rwanda and Uganda (**Fig. 3**). Notably, 4.3.1 was not detected in  
284 cases associated with travel to West Africa (0/11; see **Table 1, Fig. 3**). Other common  
285 genotypes include clade 3.3 (6% of total isolates), found in cases with travel to India (9% of  
286 all isolates from this location), or Bangladesh (15%); clade 2.2 (3.1% of total isolates), found  
287 in cases with travel to India (2%) or Pakistan (4.5%); subclade 3.2.2 (2.6% of total isolates),  
288 found in 21% of cases with travel to Bangladesh; and subclade 3.1.1 (1.7% of total isolates),  
289 found in 7/11 (63%) of cases with travel to West Africa, including Nigeria (n=4/6), Ghana (2/2)  
290 and Sierra Leone (1/1).

291

292 **Fig. 2. Membership of *S. Typhi* by genotypes and association with AMR**

293 a) Population framework tree of the *S. Typhi* genotypes sequenced at PHE. Background  
294 shading indicates the primary clades. Tree tips indicate individual genotypes assigned by  
295 GenoTyphi; tip sizes and colours indicate number of isolates belonging to each genotype,  
296 these values (n) are also printed to the right. b) Frequency of MDR for each genotype  
297 (defined based on presence of AMR genes encoding resistance to the first line drugs  
298 ampicillin, trimethoprim-sulfamethoxazole, or chloramphenicol). c) Frequency of QRDR  
299 mutations by genotype.

300

### 301 **Fig. 3. Geographic distribution of *S. Typhi* based on reported country of travel**

302 *S. Typhi* isolates with completed travel questionnaires and reporting travel to only one  
303 country are shown. The number in each circle indicates the total number of cases reporting  
304 travel to that country, circle graphs indicate the genotype composition of the corresponding  
305 *S. Typhi* isolates, stratified by MDR, coloured as per inset legend.

306

### 307 **Multi-drug resistance and QRDR mutations by region**

308 The overall frequency of MDR, defined as carriage of genes associated with resistance to  
309 ampicillin (*bla<sub>TEM-1</sub>*), chloramphenicol (*catA1*) and co-trimoxazole (*sul1* or *sul2* plus a *dfrA*  
310 gene), was 129 (24%). MDR *S. Typhi* was associated with reported travel to 10 countries,  
311 with high frequencies amongst isolates whose cases report travel to Zimbabwe (80%),  
312 Nigeria (33%), Tanzania (50%), Ghana (50%), Bangladesh (24%) and Pakistan (55%)  
313 (**Table 1, Fig. 3**). MDR was also present at low frequency amongst cases with reported  
314 travel to India (3%), and singleton MDR isolates were detected from Mozambique, United  
315 Arab Emirates and Afghanistan. Notably the majority of MDR isolates were linked with travel  
316 to Pakistan (n=85, 66% of all MDR isolates) and other South Asian countries (n=100, 77% of  
317 all MDR isolates; see **Table 1**).

318

319 All MDR isolates belonged to either 4.3.1 (n=125) or 3.1.1 (n=4, see **Fig. 2b**). The frequency  
320 of MDR was highest in 4.3.1.1 (96%), then 3.1.1 (3%), and one isolate in 4.3.1 (**Fig. 2b, Fig.**

321 **3)**. At the regional level, MDR was common amongst cases associated with travel to East  
322 Africa (52%), West Africa (27%) and South Asia (26%), but not with travel elsewhere (with  
323 the exception of one isolate from UAE; see **Table 1**). However, there were significant  
324 differences between countries within these regions, associated with differences in the  
325 dominant *S. Typhi* clades (**Fig. 3**). In East Africa and South Asia, MDR was detected  
326 amongst cases associated with travel to the countries dominated by MDR-associated  
327 lineage 4.3.1 lineage I (Mozambique, Tanzania and Zimbabwe in East Africa; and  
328 Bangladesh and Pakistan in South Asia; see **Table 1, Fig. 3**). In West Africa, MDR was  
329 detected in three isolates (n=2 Nigeria, n=1 Ghana), all belonging to the region's dominant  
330 subclade 3.1.1 (a fourth MDR 3.1.1 infection had no reported travel).

331

332 QRDR mutations were identified in 455 isolates (85.4%) originating from 18 countries (**Table**  
333 **1, S1 Table**). QRDR mutants were most frequent in India (97%), Bangladesh (94%), Nepal  
334 (66%), Pakistan (94%), Myanmar (100%), Uganda (100%), and Nigeria (50%). Singleton  
335 QRDR mutants were also identified in China, Malaysia, Afghanistan, United Arab Emirates,  
336 Egypt, Rwanda, Peru, Greece and Zimbabwe. QRDR triple mutants were identified only in  
337 isolates associated with travel to South Asia: 33% of isolates from Nepal, 23% of those from  
338 India and 4% of those from Pakistan (**Table 1**). Overall, the presence of QRDR mutations  
339 was very common in cases associated with travel to South Asia (95% of all isolates linked to  
340 this region), and significantly less common ( $p < 2.2e16$  using Chi-squared trend test) in East  
341 Africa (43%,) and West Africa (27%; see **Table 1**).

342

343 Ciprofloxacin MICs have been previously reported for 173 of the *S. Typhi* isolates (**S1**  
344 **Table**)[37], and a comparison of QRDR mutations with these phenotypes is shown in **Fig. 4**  
345 to facilitate the interpretation of QRDR mutations. These data showed that all isolates  
346 carrying a single QRDR mutation had ciprofloxacin MIC of at least 0.064 µg/mL (exceeding  
347 the EUCAST threshold for susceptibility); all those with two QRDR mutations had MIC of  
348 0.125 µg/mL; and all those with three mutations had MIC  $\geq 1$  µg/mL (above the threshold for

349 resistance) (**Fig. 4**). The most common mutations were *gyrA*-S83F (n=271, 51%) and *gyrA*-  
 350 S83Y (n=83, 16%), which were found in 18 genotypes in cases associated with travel to  
 351 eleven and six countries respectively (**Table 2**). Double mutants (*gyrA*-S38F or -S83Y plus a  
 352 mutation in *parC*), associated with elevation of ciprofloxacin MIC to  $\geq 0.25$   $\mu\text{g/mL}$  (**Fig. 4**),  
 353 were found in 16 isolates (3.0%) associated with travel to India or Bangladesh. A total of 61  
 354 isolates were identified as QRDR triple mutants, which display resistance to ciprofloxacin  
 355 (MIC >1  $\mu\text{g/mL}$ , see **Fig. 4**) and have been associated with fluoroquinolone treatment  
 356 failure[8]. Most of these (n=59) carried *gyrA*-S83F, *gyrA*-D87N and *parC*-S80I mutations,  
 357 while the remaining two had a unique profile of *gyrA*-S83F, *gyrA*-D87G and *parC*-S80I and  
 358 of *gyrA*-S83FY, *parC*-Y74X and *parC*-P98X (**Table 2**).

359

360 **Table 2: Combinations of coding changes detected in the QRDR and their**  
 361 **frequency by country of reported travel**

| Country              | Region        | Gene combination (with amino acid change) | Frequency |
|----------------------|---------------|-------------------------------------------|-----------|
| China                | Central Asia  | <i>gyrA</i> -S83F                         | 1         |
| Rwanda               | East Africa   | <i>gyrA</i> -S83Y                         | 1         |
| Tanzania             |               | <i>gyrA</i> -D87G                         | 2         |
| Uganda               |               | <i>gyrA</i> -S83Y                         | 4         |
| Zimbabwe             |               | <i>gyrA</i> -D87Y                         | 2         |
| Greece               | Europe        | <i>gyrA</i> -S83F                         | 1         |
| Iraq                 | Middle East   | <i>gyrA</i> -S83F                         | 1         |
| United Arab Emirates |               | <i>gyrA</i> -S83F                         | 1         |
| Egypt                | North Africa  | <i>gyrA</i> -D87G                         | 1         |
| Peru                 | South America | <i>gyrA</i> -S83F                         | 1         |
| Afghanistan          | South Asia    | <i>gyrA</i> -S83F                         | 1         |
| Bangladesh           |               | <i>gyrA</i> -S83F                         | 25        |
|                      |               | <i>gyrA</i> -S83F <i>parC</i> -E84K       | 2         |
|                      |               | <i>gyrA</i> -S83Y                         | 1         |

|                              |                 |                                                       |     |
|------------------------------|-----------------|-------------------------------------------------------|-----|
|                              |                 | <i>gyrA</i> -D87N                                     | 3   |
| <b>India</b>                 |                 | <i>gyrA</i> -S83F <i>gyrA</i> -D87G <i>parC</i> -S80I | 1   |
|                              |                 | <i>gyrA</i> -S83F <i>gyrA</i> -D87N <i>parC</i> -S80I | 41  |
|                              |                 | <i>gyrA</i> -S83F                                     | 71  |
|                              |                 | <i>gyrA</i> -S83F <i>parC</i> -G78D                   | 2   |
|                              |                 | <i>gyrA</i> -S83F <i>parC</i> -S80I                   | 4   |
|                              |                 | <i>gyrA</i> -S83F <i>parC</i> -E84G                   | 2   |
|                              |                 | <i>gyrA</i> -S83Y                                     | 56  |
|                              |                 | <i>gyrA</i> -S83Y <i>parC</i> -Y74X <i>parC</i> -P98X | 1   |
|                              |                 | <i>gyrA</i> -S83Y <i>parC</i> -D79G                   | 5   |
|                              |                 | <i>gyrA</i> -D87N                                     | 2   |
|                              |                 | <i>gyrA</i> -D87Y                                     | 1   |
| <b>Nepal</b>                 |                 | <i>gyrA</i> -S83F <i>gyrA</i> -D87N <i>parC</i> -S80I | 1   |
|                              |                 | <i>gyrA</i> -D87G                                     | 1   |
| <b>Pakistan</b>              |                 | <i>gyrA</i> -S83F <i>gyrA</i> -D87N <i>parC</i> -S80I | 6   |
|                              |                 | <i>gyrA</i> -S83F                                     | 134 |
|                              |                 | <i>gyrA</i> -S83F*                                    | 1   |
|                              |                 | <i>gyrA</i> -S83Y                                     | 1   |
|                              |                 | <i>gyrA</i> -D87G                                     | 2   |
|                              |                 | <i>gyrA</i> -D87N                                     | 2   |
| <b>Malaysia</b>              | South East Asia | <i>gyrA</i> -S83F                                     | 1   |
| <b>Myanmar</b>               |                 | <i>gyrA</i> -S83F                                     | 1   |
|                              |                 | <i>gyrA</i> -D87N                                     | 1   |
| <b>Nigeria</b>               | West Africa     | <i>gyrA</i> -S83Y                                     | 3   |
| <b>No Travel Information</b> | No information  | <i>gyrA</i> -S83F <i>gyrA</i> -D87N <i>parC</i> -S80I | 4   |
|                              |                 | <i>gyrA</i> -S83F                                     | 16  |
|                              |                 | <i>gyrA</i> -S83F <i>parC</i> -E84K                   | 1   |
|                              |                 | <i>gyrA</i> -S83Y                                     | 9   |
|                              |                 | <i>gyrA</i> -D87G                                     | 2   |
|                              |                 | <i>gyrA</i> -D87N                                     | 3   |
|                              |                 | <i>gyrA</i> -D87Y                                     | 1   |
| <b>No Travel</b>             | None            | <i>gyrA</i> -S83F <i>gyrA</i> -D87 <i>parC</i> -S80I  | 2   |



|  |                   |    |
|--|-------------------|----|
|  | <i>gyrA</i> -S83F | 15 |
|  | <i>gyrA</i> -S83Y | 3  |

362 \* The acquired quinolone resistance (*qnr*) gene, *qnrB*, was also detected in this isolate. The only  
363 other *qnr* genes detected were two isolates from Zimbabwe that carried *qnrS1* genes but no QRDR  
364 mutations.

365

366 **Fig. 4. Minimum inhibitory concentration (MIC) for ciprofloxacin versus number of**  
367 **point mutations in QRDRs in two chromosomal genes**

368 The number of isolates with different combinations of MIC values and point mutations  
369 detected in the QRDRs of two chromosomal genes, *gyrA* and *parC*, are shown. The  
370 breakpoints of susceptible, reduced susceptibility and resistance are shown by the  
371 background gradient of the plot. The triangle indicates an isolate that carries *qnrS-1*.

372

373 All QRDR double and triple mutants belonged to genotype 4.3.1 and were associated with  
374 travel to South Asia (or no/unknown travel). Overall, QRDR mutations were significantly  
375 more common in 4.3.1 lineage II compared to lineage I (99% vs 91%,  $p=0.006$ , two-sided  
376 test of difference in proportions). The 61 QRDR triple mutants were detected only in *S. Typhi*  
377 4.3.1 lineage II isolates (**Fig. 2c**) and were associated with either travel to India ( $n=43$ , 22.5%  
378 of all isolates from this location, where lineage II is dominant); travel to neighbouring  
379 countries Pakistan ( $n=6$ ) or Nepal ( $n=1$ ); travel to multiple destinations including India ( $n=5$ );  
380 no reported travel ( $n=2$ ); or no travel information available ( $n=4$ ) (**Tables 1-2**). Notably  
381 because all 4.3.1 MDR isolates belonged to lineage I, and all QRDR triple mutants belonged  
382 to lineage II (**Fig. 2**), there were no isolates with both MDR and three QRDR mutations (**Fig.**  
383 **2, S1 Table**). There were however 119 cases with MDR plus 1-2 QRDR mutations (i.e.  
384 reduced susceptibility to fluoroquinolones, **Fig. 4**). The vast majority of these were 4.3.1  
385 lineage I ( $n=115$ ), most commonly associated with travel to Pakistan ( $n=85$ , 54.4% of  
386 isolates from this country), Bangladesh ( $n=8$ , 24%) and India ( $n=6$ , 3%) but also occasional  
387 cases who reported travel to Zimbabwe ( $n=2$ ), Tanzania ( $n=2$ ) and United Arab Emirates

388 (n=1). Three 3.1.1 isolates were also MDR with one QRDR mutation (n=2 travel to Nigeria,  
389 n=1 with no recorded travel).

390

### 391 **Plasmid vs chromosomal location of AMR genes in *S. Typhi***

392 All MDR isolates belonged to 4.3.1 (n=125) or 3.1.1 (n=4) and carried the typical *S. Typhi*

393 MDR composite transposon comprising Tn6029 (encoding *bla*<sub>TEM-1</sub>, *sul2*, *strAB*) inserted in

394 Tn21 (carrying a class I integron encoding *dfrA* alleles in the gene cassette and *sul1* at the

395 end), which is in turn inserted within Tn9 (encoding *catA1*)[47] (see **Fig. 5a**). All 125 MDR

396 4.3.1 isolates (associated with South Asia and East Africa) carried *dfrA7* in the integron

397 cassette and no plasmid replicons (**Fig. 5a**). In most of these (n=123, 98%), we detected

398 chromosomal IS1 insertions at sites previously associated with IS1-mediated integration of

399 the MDR composite transposon (**S1 Fig.**) (*cyaA* or *yidA* sites[12,18]). A putative IS1

400 insertion was detected in the novel site STY3168 in a single genome (SRR5500440).

401 Further, of the six isolates with four IS1 sites detected, five had recent travel to Pakistan with

402 last isolate having no reported travel (**S1 Fig.**). Notably, most (93%) of the MDR 4.3.1

403 isolates also carried a QRDR mutation, the most common being *gyrA*-S83F (**Table 2, S1**

404 **Fig.**). The four MDR 3.1.1 isolates (associated with West Africa) carried IncHI1 PST2

405 plasmids with *dfrA15* in the integron cassette (**Fig. 5b**). An IncHI1 PST2 plasmid was also

406 identified in a single non-MDR 2.3.1 isolate associated with travel to Nigeria. The plasmid

407 backbone was very closely related to that of the 3.1.1 West African plasmids but carried

408 *dfrA1* in the integron cassette and lacked the chloramphenicol and ampicillin resistance

409 genes *catA1* and *bla*<sub>TEM</sub> (**Fig. 5a-b**).

410

### 411 **Fig. 5. Mobilisation of MDR element in *S. Typhi***

412 a) Structure of the MDR composite transposon in *S. Typhi* strain ERL12960 (4.3.1 lineage I)

413 is shown (accession ERL12960). MDR genes are those encoding resistance to the first line

414 drugs ampicillin, trimethoprim-sulfamethoxazole or chloramphenicol b) Phylogeny showing

415 genetic relationships between the five IncHI1 PST2 *S. Typhi* isolates identified in this study,

416 based on SNVs identified in the plasmid backbone sequence and rooted using the PST1  
417 plasmid pUI1203\_01 (accession ERR340785) as an outgroup. The presence of AMR genes  
418 detected in each genome is indicated in the heatmap, with alleles specified for *dfrA* and  
419 *bla<sub>TEM</sub>* genes.

420

421 Plasmid replicon and AMR gene screening identified additional plasmid replicons and AMR  
422 genes at low frequency. Two of the MDR 4.3.1.1 isolates from Zimbabwe carried IncN  
423 (subtype PST3) plasmids. In addition to the genes typical of the MDR composite transposon  
424 (with *dfrA7* in the integron), these isolates also carried *qnrS*, *dfrA14* and *tet(A)*. It was not  
425 possible to resolve the precise locations of the acquired AMR genes due to the limitations of  
426 short read assembly. As these isolates lack QRDR mutations, the presence of the *qnrS*  
427 gene is predicted to confer reduced susceptibility to fluoroquinolones but not full resistance;  
428 indeed, one of the isolates (SRR4063811) was phenotyped and displayed reduced  
429 susceptibility to ciprofloxacin, with MIC 0.25 µg/mL. IncN plasmids (subtype PST5) were  
430 found in three non-MDR 4.3.1.2 isolates that carried *dfrA15*, *sul1* and *tet(A)*. These isolates  
431 (two from India, one with no reported travel) were also QRDR triple mutants and thus  
432 predicted to be fully resistant to fluoroquinolones. The combination of *dfrA14*, *sul2*, *bla<sub>TEM-1</sub>*,  
433 *strA* and *strB* was detected in three 4.3.1.1 isolates with no QRDR mutations (two with travel  
434 to Tanzania, one with no travel information). All three carried sequences with similarity (100%  
435 nucleotide identity and 50% coverage) to a FIB<sub>K</sub> plasmid carrying *dfrA14*, *sul2* and *bla<sub>TEM-1</sub>*  
436 that was previously sequenced from a 2008 Tanzanian *S. Typhi*, strain 129-0238 (GenBank  
437 accession LT904889)[12]. The same combination of AMR genes (*dfrA14*, *sul2*, *bla<sub>TEM-1</sub>*, *strA*  
438 and *strB*) plus *tet(A)* were also found in a 3.1.1 *gyrA*-S83Y isolate from Nigeria that  
439 harboured an IncY plasmid replicon.

440

## 441 Discussion

442 Here we demonstrate the utility of using *S. Typhi* WGS data generated routinely at a public  
443 health laboratory in the UK to serve as informal surveillance for different geographical  
444 regions where typhoid fever is endemic. The PHE dataset encompasses a diverse collection  
445 of 533 *S. Typhi* isolates from multiple geographical regions collected over a three-year  
446 sampling period (**Fig. 1**). As typhoid fever has not been endemic in England since the  
447 successful interventions of the major controlling measures, water sanitation and hygiene  
448 complemented with antimicrobial therapy[27,48], it is assumed that notified cases to PHE  
449 are associated with returned travellers and their contacts. The collection is biased towards  
450 isolates from South Asia and East Africa which reflects historical and contemporary ties  
451 between England and these regions, however these are also regions that experience a high  
452 burden of typhoid fever and could benefit from the AMR and WGS data obtained routinely by  
453 PHE. Notably, public health agencies in other countries receive *S. Typhi* isolates reflecting  
454 the distinct travel habits of their own populations (for example Institut Pasteur receives more  
455 *S. Typhi* from travellers visiting Francophone countries in Africa and former French colonies  
456 such as Vietnam), and the synthesis of these diverse collections could potentially provide  
457 more extensive sentinel surveillance coverage of typhoid endemic regions.

458

459 Typing the *S. Typhi* isolates using the GenoTyphi scheme enabled rapid classification of the  
460 533 genomes into 31 distinct lineages (**Fig. 2**). This simple tree-free approach showed  
461 clustering of subclades by geographical region of travel that was consistent with previous  
462 previously reported geographical patterns[11], providing support for the use of travel  
463 associated isolates as an indicator of local pathogen populations. Notable examples include  
464 the detection of MDR subclade 4.3.1 in East Africa and South Asia [8,15], and the complete  
465 absence of subclade 4.3.1 in the isolates from West Africa[14] (**Fig. 3**). Genomes from  
466 cases reporting travel to West Africa were genotyped as 3.1.1, consistent with earlier studies  
467 where 3.1.1 was found to be the main *S. Typhi* lineage in the region[13,14]. Furthermore, for  
468 isolates with travel to more than one country, the genotype can help to discern the most  
469 likely origin of the infection; for example, for one case reporting travel to Nigeria and Turkey,

470 the genome isolate (SRR558502) was identified as genotype 3.1.1, suggesting that the  
471 pathogen was most likely acquired in Nigeria. This further demonstrates the public health  
472 utility of WGS data on returning traveller isolates. Notably the GenoTyphi scheme provides a  
473 mechanism and nomenclature for such insights to be achieved simply and rapidly from  
474 individual genomes and by different laboratories working independently, without need for  
475 phylogenetic tree construction or other comparative analyses.

476

477 Data from this study revealed that reduced susceptibility to fluoroquinolones was common  
478 amongst *S. Typhi* associated with diverse geographic sites and genotypes. However, the  
479 ciprofloxacin resistant QRDR triple mutants were all from cases belonging to subclade  
480 4.3.1.2 (**Fig. 2, Table 2**), the majority of which had reported travel to South Asia, mainly  
481 India. These data align with previous findings[8,19], and support the hypothesis that high  
482 levels of fluoroquinolone exposure in India through healthcare and the environment are  
483 driving the emergence of resistant *S. Typhi* and other pathogens in the region[49] and  
484 contributing to treatment failure for typhoid fever[8]. Further, in addition to confirming that  
485 QRDR triple mutants are resistant to ciprofloxacin, the MIC data clearly showed that even a  
486 single QRDR mutation is associated with reduced ciprofloxacin susceptibility (MIC 0.06-0.25  
487 µg/mL) (**Fig 4**), which has also been associated with clinical failure[37,50].

488

489 Strikingly in this data set all 4.3.1 MDR isolates carried the composite transposon integrated  
490 in the chromosome, suggesting an enormous shift in the burden of MDR typhoid from  
491 plasmid-borne resistance. This is of grave concern as it means that there is likely to be very  
492 little fitness cost associated with carriage of the MDR transposon. In the late 1990s the  
493 increase in MDR typhoid in Asia prompted a switch to fluoroquinolones for treatment, which  
494 in Nepal and other regions was followed by almost complete loss of the MDR plasmid from  
495 the *S. Typhi* population, suggesting that the fitness cost of the plasmid leads to plasmid loss  
496 in the absence of selection from the first-line drugs. However, the integration of the MDR  
497 transposon into the *S. Typhi* chromosome likely alleviates any fitness cost, making it more

498 likely that MDR will be maintained even in the absence of selection for the specific  
499 resistances encoded. We showed that the two most common sites for chromosomal  
500 integration of the MDR element was at the known sites *yidA* or upstream of *cyaA* in the  
501 4.3.1.1 lineage. Of particular note was the increase in number of IS1 insertions in from cases  
502 in subclade 4.3.1.1 with reported travel to Pakistan (**S1 Fig.**). We may hypothesise that the  
503 *S. Typhi* from this region may be more likely to acquire novel mechanisms in response to  
504 local selective pressures. Indeed, the recent acquisition of an IncY plasmid harbouring  
505 *bla*<sub>CTX-M-15</sub> and *qnrS* genes has resulted in the emergence of an XDR lineage of *S. Typhi* from  
506 Pakistan[24] and an IncI1 plasmid encoding *bla*<sub>CTX-M-15</sub> in an *S. Typhi* from Bangladesh[51]  
507 provides evidence for this hypothesis, highlighting the importance of ongoing surveillance of  
508 these regions that experience a high burden of typhoid fever.

509

510 Currently there are three critical AMR threats posed by *S. Typhi*, namely the dissemination  
511 of mobile AMR genes mediating MDR profiles, the evolution of point mutations in *gyrA* and  
512 *parC*, two core housekeeping genes, that confer differing levels of fluoroquinolone  
513 resistance (**Fig. 2, Fig. 4**), and the recent emergence of XDR *S. Typhi*. The WGS data  
514 presented here provide insight into changing AMR dynamics within *S. Typhi*. Importantly, the  
515 concordance of genomic and phenotypic AMR data for ciprofloxacin resistance in this study  
516 (**Fig. 4**) which have been extensively characterised for *S. Typhi* for multiple drugs  
517 previously[37], demonstrates the utility of WGS for robustly characterising AMR profiles.  
518 Here, two of the AMR threats were characterised within the *S. Typhi* collection, reflecting  
519 geographical differences in AMR profiles. While no XDR *S. Typhi* had been detected in the  
520 PHE collection between April 2014 and March 2017, the first XDR *S. Typhi* isolate in a  
521 returned traveller with recent travel to Pakistan shortly after XDR *S. Typhi* were reported  
522 from Pakistan has been identified[24,28]. This highlights the value in using these data as  
523 informal surveillance of *S. Typhi* as we hypothesise that resistance to second-line drugs  
524 such as azithromycin will arise under continued selective pressure as has occurred with  
525 previous drugs.

526

527 **Funding information**

528 DJI was supported by the Victoria Fellowship from the Department of Economic

529 Development, Jobs, Transport and Resources, State Government of Victoria, Australia.

530 KEH was supported by a Senior Medical Research Fellowship from the Viertel Foundation of

531 Australia and the Bill and Melinda Gates Foundation, Seattle. ZAD is supported by a project

532 funded by the Wellcome Trust of Great Britain (106158/Z/14/Z). TJD is affiliated to the

533 National Institute for Health Research Health Protection Research Unit (NIHR HPRU) in

534 Gastrointestinal Infections at University of Liverpool in partnership with Public Health

535 England (PHE), in collaboration with University of East Anglia, University of Oxford and the

536 Quadram Institute.

537

538 **Conflict of interest**

539 The authors declare no competing interests

540

541 **Author contributions**

542 D.J.I., S.N., M.A.C., K.E.H. and T.J.D. contributed to the design of the study and

543 data interpretation. D.J.I. performed the majority of bioinformatic analyses with input

544 from Z.A.D., P.A., H.H., S.N, T.J.D. and K.E.H. The travel data was collected by J.F.

545 The ciprofloxacin phenotypic resistance data was generated by S.N. and M.D. All

546 authors contributed to the writing of the manuscript.

547

## 548 **References**

- 549 1. Parry CM, Hien TT, Dougan G, White NJ, Farrar JJ. Typhoid Fever. *N Engl J Med*.  
550 2002;347: 1770–1782.
- 551 2. Crump JA, Mintz ED. Global Trends in Typhoid and Paratyphoid Fever. *Clin Infect Dis*.  
552 2010;50: 241–246. doi:10.1086/649541
- 553 3. Mogasale V, Maskery B, Ochiai RL, Lee JS, Mogasale VV, Ramani E, et al. Burden of  
554 typhoid fever in low-income and middle-income countries: a systematic, literature-based  
555 update with risk-factor adjustment. *The Lancet Global Health*. 2014;2: e570–e580.  
556 doi:10.1016/S2214-109X(14)70301-8
- 557 4. Holt KE, Phan MD, Baker S, Duy PT, Nga TVT, Nair S, et al. Emergence of a globally  
558 dominant IncHI1 plasmid type associated with multiple drug resistant Typhoid. *PLoS Negl*  
559 *Trop Dis*. 2011;5: 1–13. doi:10.1371/journal.pntd.0001245.t005
- 560 5. Roumagnac P, Weill F-X, Dolecek C, Baker S, Brisse S, Chinh NT, et al. Evolutionary  
561 history of *Salmonella* Typhi. *Science*. 2006;314: 1301–1304.  
562 doi:10.1126/science.1134933
- 563 6. Akhtar S, Sarker MR, Jabeen K, Sattar A, Qamar A, Fasih N. Antimicrobial resistance in  
564 *Salmonella enterica* serovar Typhi and Paratyphi in South Asia-current status, issues and  
565 prospects. *Critical Reviews in Microbiology*. 2014;41: 536–545.  
566 doi:10.3109/1040841X.2014.880662
- 567 7. Levine MM, Simon R. The gathering storm: Is untreatable Typhoid Fever on the way.  
568 *mBio*. 2018;9.
- 569 8. Pham Thanh D, Karkey A, Dongol S, Ho Thi N, Thompson CN, Rabaa MA, et al. A novel  
570 ciprofloxacin-resistant subclade of H58 *Salmonella* Typhi is associated with  
571 fluoroquinolone treatment failure. *eLIFE*. 2016;5: 445–13. doi:10.7554/eLife.14003
- 572 9. Chiou C-S, Lauderdale T-L, Phung DC, Watanabe H, Kuo J-C, Wang P-J, et al.



- 573 Antimicrobial resistance in *Salmonella enterica* serovar Typhi isolates from Bangladesh,  
574 Indonesia, Taiwan, and Vietnam. *Antimicrob Agents Chemother.* 2014;58: 6501–6507.  
575 doi:10.1128/AAC.03608-14
- 576 10. Holt KE, Parkhill J, Mazzoni CJ, Roumagnac P, Weill F-X, Goodhead I, et al. High-  
577 throughput sequencing provides insights into genome variation and evolution in  
578 *Salmonella* Typhi. *Nat Genet.* 2008;40: 987–993. doi:10.1038/ng.195
- 579 11. Wong VK, Baker S, Connor TR, Pickard D, Page AJ, Dave J, et al. An extended  
580 genotyping framework for *Salmonella enterica* serovar Typhi, the cause of human typhoid.  
581 *Nat Comms.* 2016;7: 1–11. doi:10.1038/ncomms12827
- 582 12. Wong VK, Baker S, Pickard DJ, Parkhill J, Page AJ, Feasey NA, et al. Phylogeographical  
583 analysis of the dominant multidrug-resistant H58 clade of *Salmonella* Typhi identifies  
584 inter- and intracontinental transmission events. *Nat Genet.* 2015;47: 632–639.  
585 doi:10.1038/ng.3281
- 586 13. International Typhoid Consortium, Wong VK, Holt KE, Okoro C, Baker S, Pickard DJ, et al.  
587 Molecular surveillance identifies multiple transmissions of Typhoid in West Africa. *PLoS*  
588 *Negl Trop Dis.* 2016;10: e0004781–22. doi:10.1371/journal.pntd.0004781
- 589 14. Park SE, Pham DT, Boinett C, Wong VK, Pak GD, Panzner U, et al. The phylogeography  
590 and incidence of multi-drug resistant typhoid fever in sub-Saharan Africa. *Nat Comms.*  
591 2018: 1–10. doi:10.1038/s41467-018-07370-z
- 592 15. Dyson ZA, Thanh DP, Bodhidatta L, Mason CJ, Srijan A, Rabaa MA, et al. Whole  
593 Genome sequence analysis of *Salmonella* Typhi isolated in Thailand before and after the  
594 introduction of a National Immunization Program. *PLoS Negl Trop Dis.* 2017;11:  
595 e0005274–15. doi:10.1371/journal.pntd.0005274
- 596 16. Kariuki S, Revathi G, Kiiru J, Mengo DM, Mwituria J, Muyodi J, et al. Typhoid in Kenya is  
597 associated with a dominant multidrug-resistant *Salmonella enterica* serovar Typhi

- 598 haplotype that is also widespread in Southeast Asia. *J Clin Microbiol.* 2010;48: 2171–  
599 2176. doi:10.1128/JCM.01983-09
- 600 17. Phan MD, Kidgell C, Nair S, Holt KE, Turner AK, Hinds J, et al. Variation in *Salmonella*  
601 *enterica* serovar Typhi IncHI1 plasmids during the global spread of resistant Typhoid  
602 Fever. *Antimicrob Agents Chemother.* 2009;53: 716–727. doi:10.1128/AAC.00645-08
- 603 18. Ashton PM, Nair S, Dallman T, Rubino S, Rabsch W, Mwaigwisya S, et al. MinION  
604 nanopore sequencing identifies the position and structure of a bacterial antibiotic  
605 resistance island. *Nat Biotechnol.* 2014;33: 296–300. doi:10.1038/nbt.3103
- 606 19. Britto CD, Dyson ZA, Duchêne S, Carter MJ, Gurung M, Kelly DF, et al. Laboratory and  
607 molecular surveillance of paediatric typhoidal *Salmonella* in Nepal: Antimicrobial  
608 resistance and implications for vaccine policy. *PLoS Negl Trop Dis.* 2018;12: e0006408–  
609 19. doi:10.1371/journal.pntd.0006408
- 610 20. Feasey NA, Gaskell K, Wong V, Msefula C, Selemani G, Kumwenda S, et al. Rapid  
611 emergence of multidrug resistant, H58-Lineage *Salmonella* Typhi in Blantyre, Malawi.  
612 *PLoS Negl Trop Dis.* 2015;9: e0003748–13. doi:10.1371/journal.pntd.0003748
- 613 21. Hendriksen RS, Leekitcharoenphon P, Lukjancenko O, Lukwesa-Musyani C,  
614 Tambatamba B, Mwaba J, et al. Genomic signature of multidrug-resistant *Salmonella*  
615 *enterica* serovar Typhi isolates related to a massive outbreak in Zambia between 2010  
616 and 2012. *J Clin Microbiol.* 2015;53: 262–272. doi:10.1128/JCM.02026-14
- 617 22. Britto C, Pollard AJ, Voysey M, Blohmke CJ. An appraisal of the clinical features of  
618 pediatric enteric fever: Systematic review and meta-analysis of the age-stratified disease  
619 occurrence. *Clin Infect Dis.* 2017;64: 1604–1611. doi:10.1093/cid/cix229
- 620 23. Cuypers WL, Jacobs J, Wong V, Klemm EJ, Deborggraeve S, Van Puyvelde S.  
621 Fluoroquinolone resistance in *Salmonella*: insights by whole-genome sequencing. *Microb*  
622 *Genom.* 2018;4: 346–9. doi:10.1099/mgen.0.000195

- 623 24. Klemm EJ, Shakoor S, Page AJ, Qamar FN, Judge K, Saeed DK, et al. Emergence of an  
624 extensively drug-resistant *Salmonella enterica* serovar Typhi clone harboring a  
625 promiscuous plasmid encoding resistance to Fluoroquinolones and Third-Generation  
626 Cephalosporins. *mBio*. 2018;9: 346–10. doi:10.1128/mBio.00105-18
- 627 25. Munir T, Lodhi M, Ansari JK, Andleeb S, Ahmed M. Extended spectrum Beta lactamase  
628 producing cephalosporin resistant *Salmonella* Typhi, reported from Rawalpindi Pakistan. *J*  
629 *Pak Med Assoc*. 2016;66: 1035–1036.
- 630 26. Baker S, Thomson N, Weill F-X, Holt KE, kathryn. Genomic insights into the emergence  
631 and spread of antimicrobial-resistant bacterial pathogens. *Science*. 2018;360: 733–738.
- 632 27. Bhan MK, Bahl R, Bhatnagar S. Typhoid and paratyphoid fever. *The Lancet*. 2005;366:  
633 749–762. doi:10.1016/S0140-6736(05)67181-4
- 634 28. Godbole GS, Day MR, Murthy S, Chattaway MA, Nair S. First report of CTX-M-15  
635 *Salmonella* Typhi from England. *Clin Infect Dis*. 2018;66: 1976–1977.  
636 doi:10.1093/cid/ciy041
- 637 29. Ashton PM, Nair S, Peters TM, Bale JA, Powell DG, Painset A, et al. Identification of  
638 *Salmonella* for public health surveillance using whole genome sequencing. *PeerJ*. 2016;4:  
639 e1752–18. doi:10.7717/peerj.1752
- 640 30. Parkhill J, Dougan G, James KD, Thomson NR, Pickard D, Wain J, et al. Complete  
641 genome sequence of a multiple drug resistant *Salmonella enterica* serovar Typhi CT18.  
642 *Nature*. 2001;413: 848–852.
- 643 31. Langmead B, Salzberg SL. Fast gapped-read alignment with Bowtie 2. *Nat Meth*. 2012;9:  
644 357–359. doi:10.1038/nmeth.1923
- 645 32. Li H, Handsaker B, Wysoker A, Fennell T, Ruan J, Homer N, et al. The Sequence  
646 Alignment/Map format and SAMtools. *Bioinformatics*. 2009;25: 2078–2079.  
647 doi:10.1093/bioinformatics/btp352

- 648 33. Croucher NJ, Page AJ, Connor TR, Delaney AJ, Keane JA, Bentley SD, et al. Rapid  
649 phylogenetic analysis of large samples of recombinant bacterial whole genome  
650 sequences using Gubbins. *Nucleic Acids Res.* 2015;43: e15–e15.  
651 doi:10.1093/nar/gku1196
- 652 34. Day M, Doumith M, Jenkins C, Dallman TJ, Hopkins KL, Elson R, et al. Antimicrobial  
653 resistance in Shiga toxin-producing *Escherichia coli* serogroups O157 and O26 isolated  
654 from human cases of diarrhoeal disease in England, 2015. *J Antimicrob Chemother.*  
655 2017;72: 145–152. doi:10.1093/jac/dkw371
- 656 35. McArthur AG, Waglechner N, Nizam F, Yan A, Azad MA, Baylay AJ, et al. The  
657 comprehensive antibiotic resistance database. *Antimicrob Agents Chemother.* 2013;57:  
658 3348–3357. doi:10.1128/AAC.00419-13
- 659 36. Carattoli A, Zankari E, García-Fernández A, Voldby Larsen M, Lund O, Villa L, et al. *In*  
660 *silico* detection and typing of plasmids using PlasmidFinder and plasmid multilocus  
661 sequence typing. *Antimicrob Agents Chemother.* 2014;58: 3895–3903.  
662 doi:10.1128/AAC.02412-14
- 663 37. Day MR, Doumith M, Do Nascimento V, Nair S, Ashton PM, Jenkins C, et al. Comparison  
664 of phenotypic and WGS-derived antimicrobial resistance profiles of *Salmonella enterica*  
665 serovars Typhi and Paratyphi. *J Antimicrob Chemother.* 2018;73: 365–372.  
666 doi:10.1093/jac/dkx379
- 667 38. Eaves DJ, Randall L, Gray DT, Buckley A, Woodward MJ, White AP, et al. Prevalence of  
668 mutations within the quinolone resistance-determining region of *gyrA*, *gyrB*, *parC*, and  
669 *parE* and association with antibiotic resistance in quinolone-resistant *Salmonella enterica*.  
670 *Antimicrob Agents Chemother.* 2004;48: 4012–4015. doi:10.1128/AAC.48.10.4012-  
671 4015.2004
- 672 39. Hawkey J, Hamidian M, Wick RR, Edwards DJ, Billman-Jacobe H, Hall RM, et al.  
673 ISMapper: identifying transposase insertion sites in bacterial genomes from short read

- 674 sequence data. BMC Genomics. 2015: 1–11. doi:10.1186/s12864-015-1860-2
- 675 40. Phan MD, Kidgell C, Nair S, Holt KE, Turner AK, Hinds J, et al. Variation in *Salmonella*  
676 *enterica* serovar Typhi IncHI1 plasmids during the global spread of resistant typhoid fever.  
677 Antimicrob Agents Chemother. 2009;53: 716–727. doi:10.1128/AAC.00645-08
- 678 41. García-Fernández A, Villa L, Moodley A, Hasman H, Miriagou V, Guardabassi L, et al.  
679 Multilocus sequence typing of IncN plasmids. J Antimicrob Chemother. 2011;66: 1987–  
680 1991. doi:10.1093/jac/dkr225
- 681 42. Inouye M, Dashnow H, Raven L, Schultz MB, Pope BJ, Tomita T, et al. SRST2: Rapid  
682 genomic surveillance for public health and hospital microbiology labs. Genome Med.  
683 2014;6: 1–16.
- 684 43. Wick RR, Judd LM, Gorrie CL, Holt KE. Unicycler: Resolving bacterial genome  
685 assemblies from short and long sequencing reads. PLoS Comput Biol. 2017;13:  
686 e1005595–22. doi:10.1371/journal.pcbi.1005595
- 687 44. Wick RR, Schultz MB, Zobel J, Holt KE. Bandage: interactive visualization of de novo  
688 genome assemblies. Bioinformatics. 2015;31: 3550–3552.  
689 doi:10.1093/bioinformatics/btv383/-/DC1
- 690 45. Yu G, Smith DK, Zhu H, Guan Y, Lam TT-Y. ggtree: an rpackage for visualization and  
691 annotation of phylogenetic trees with their covariates and other associated data. Methods  
692 Ecol Evol. 2016;8: 28–36. doi:10.1111/2041-210X.12628
- 693 46. Wickham H. ggplot2: Elegant Graphics for Data Analysis. Cham: Springer International  
694 Publishing; 2016. doi:10.1007/978-3-319-24277-4
- 695 47. Holt KE, Thomson NR, Wain J, Phan MD, Nair S, Hasan R, et al. Multidrug-resistant  
696 *Salmonella enterica* serovar Paratyphi A harbors IncHI1 plasmids similar to those found in  
697 serovar Typhi. J Bacteriol. 2007;189: 4257–4264. doi:10.1128/JB.00232-07

- 698 48. Crump JA, Sjölund-Karlsson M, Gordon MA, Parry CM. Epidemiology, clinical  
699 presentation, laboratory diagnosis, antimicrobial resistance, and antimicrobial  
700 management of invasive *Salmonella* infections. Clin Microbiol Rev. 2015;28: 901–937.  
701 doi:10.1128/CMR.00002-15
- 702 49. The HC, Rabaa MA, Pham Thanh D, De Lappe N, Cormican M, Valcanis M, et al. South  
703 Asia as a reservoir for the global spread of ciprofloxacin-resistant *Shigella sonnei*: A  
704 cross-sectional study. PLoS Med. 2016;13: e1002055–12. doi:10.1101/041327
- 705 50. Threlfall EJ, Ward LR, Skinner JA, Smith HR, Lacey S. Ciprofloxacin-resistant *Salmonella*  
706 Typhi and treatment failure. The Lancet. 1999;353: 1590–1591. doi:10.1016/S0140-  
707 6736(99)01001-6
- 708 51. Djeghout B, Saha S, Sajib MSI, Tanmoy AM, Islam M, Kay GL, et al. Ceftriaxone-resistant  
709 *Salmonella* Typhi carries an Inc11-ST31 plasmid encoding CTX-M-15. J Med Microbiol.  
710 2018;67: 620–627. doi:10.1099/jmm.0.000727
- 711
- 712

713 **Supporting information**

714 **S1 Fig. Overview of S. Typhi PHE collection**

715 a) The phylogeny of the 533 S. Typhi isolates in the PHE collection is shown on the left with  
716 the geographical region of reported travel. b) The presence of IncHI1 or IncN plasmid  
717 replicons is shown with the different colours indicating PST. c) The presence of MDR profiles  
718 is shown in black. The presence of point mutations in QRDR genes is shown with the  
719 different gradients of blue indicating different mutations. d) Detected IS 1 sites of insertion  
720 are shown in black. The total number of IS detected in each of the S. Typhi isolates is shown  
721 on the far right.

722

723 **S1 Table. Data of 533 S. Typhi isolates received and sequenced at Public Health**

724 **England between April 2014 and April 2017**

725

726 **S2 Table. Excluded repeat and phage regions in CT18 reference**

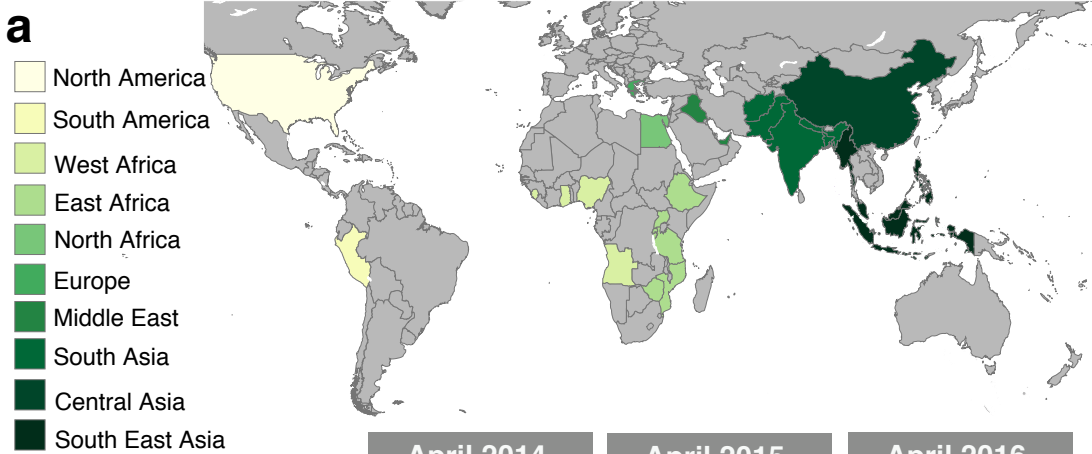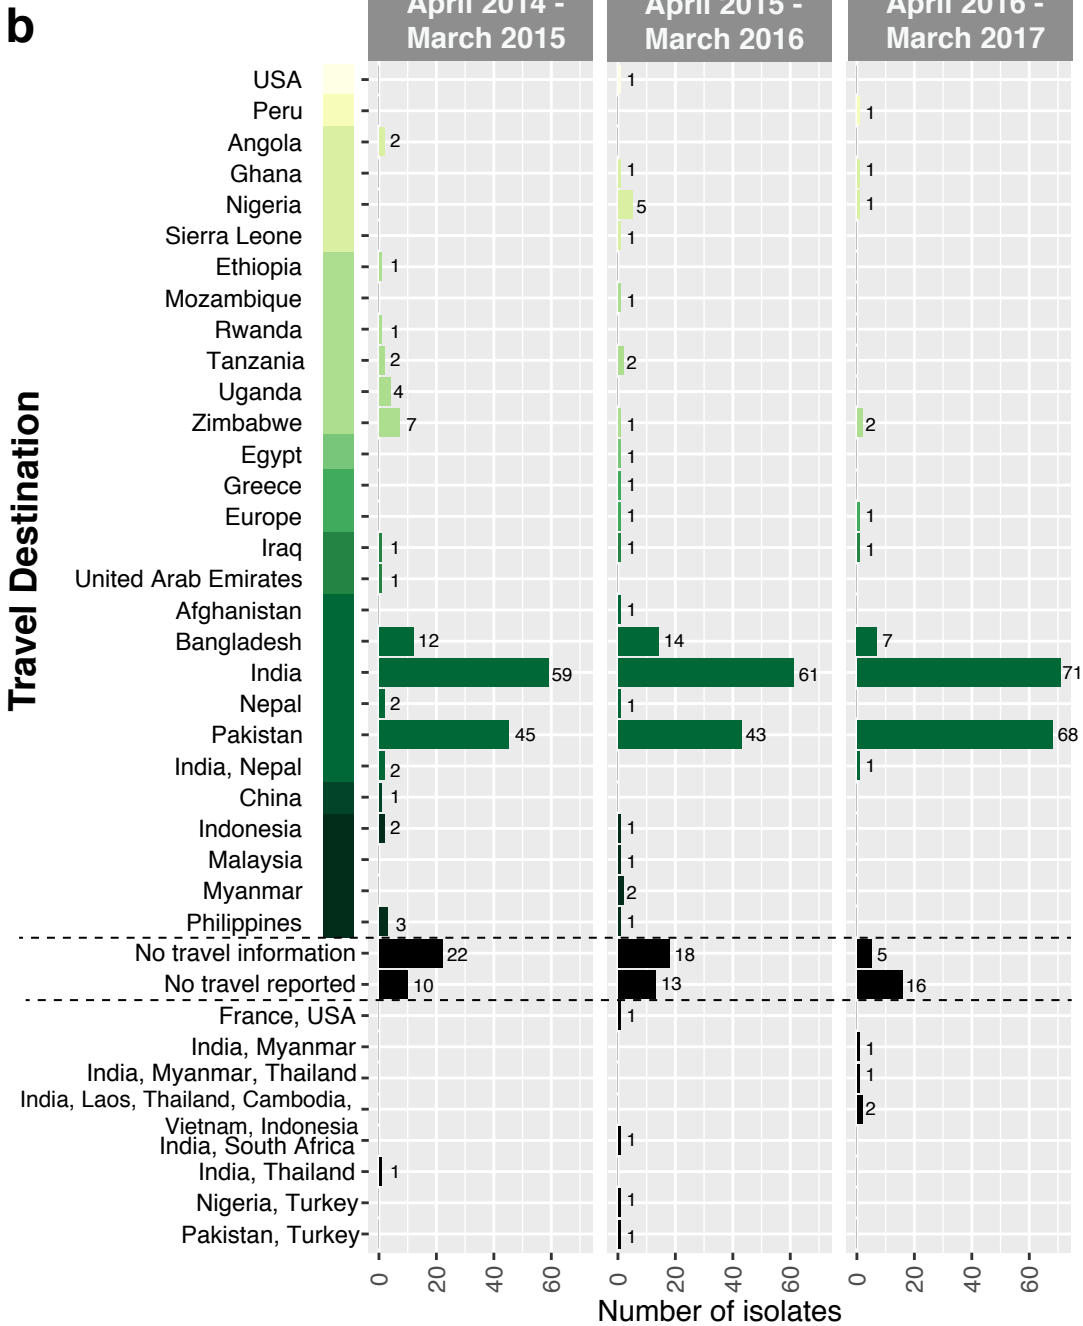



**a**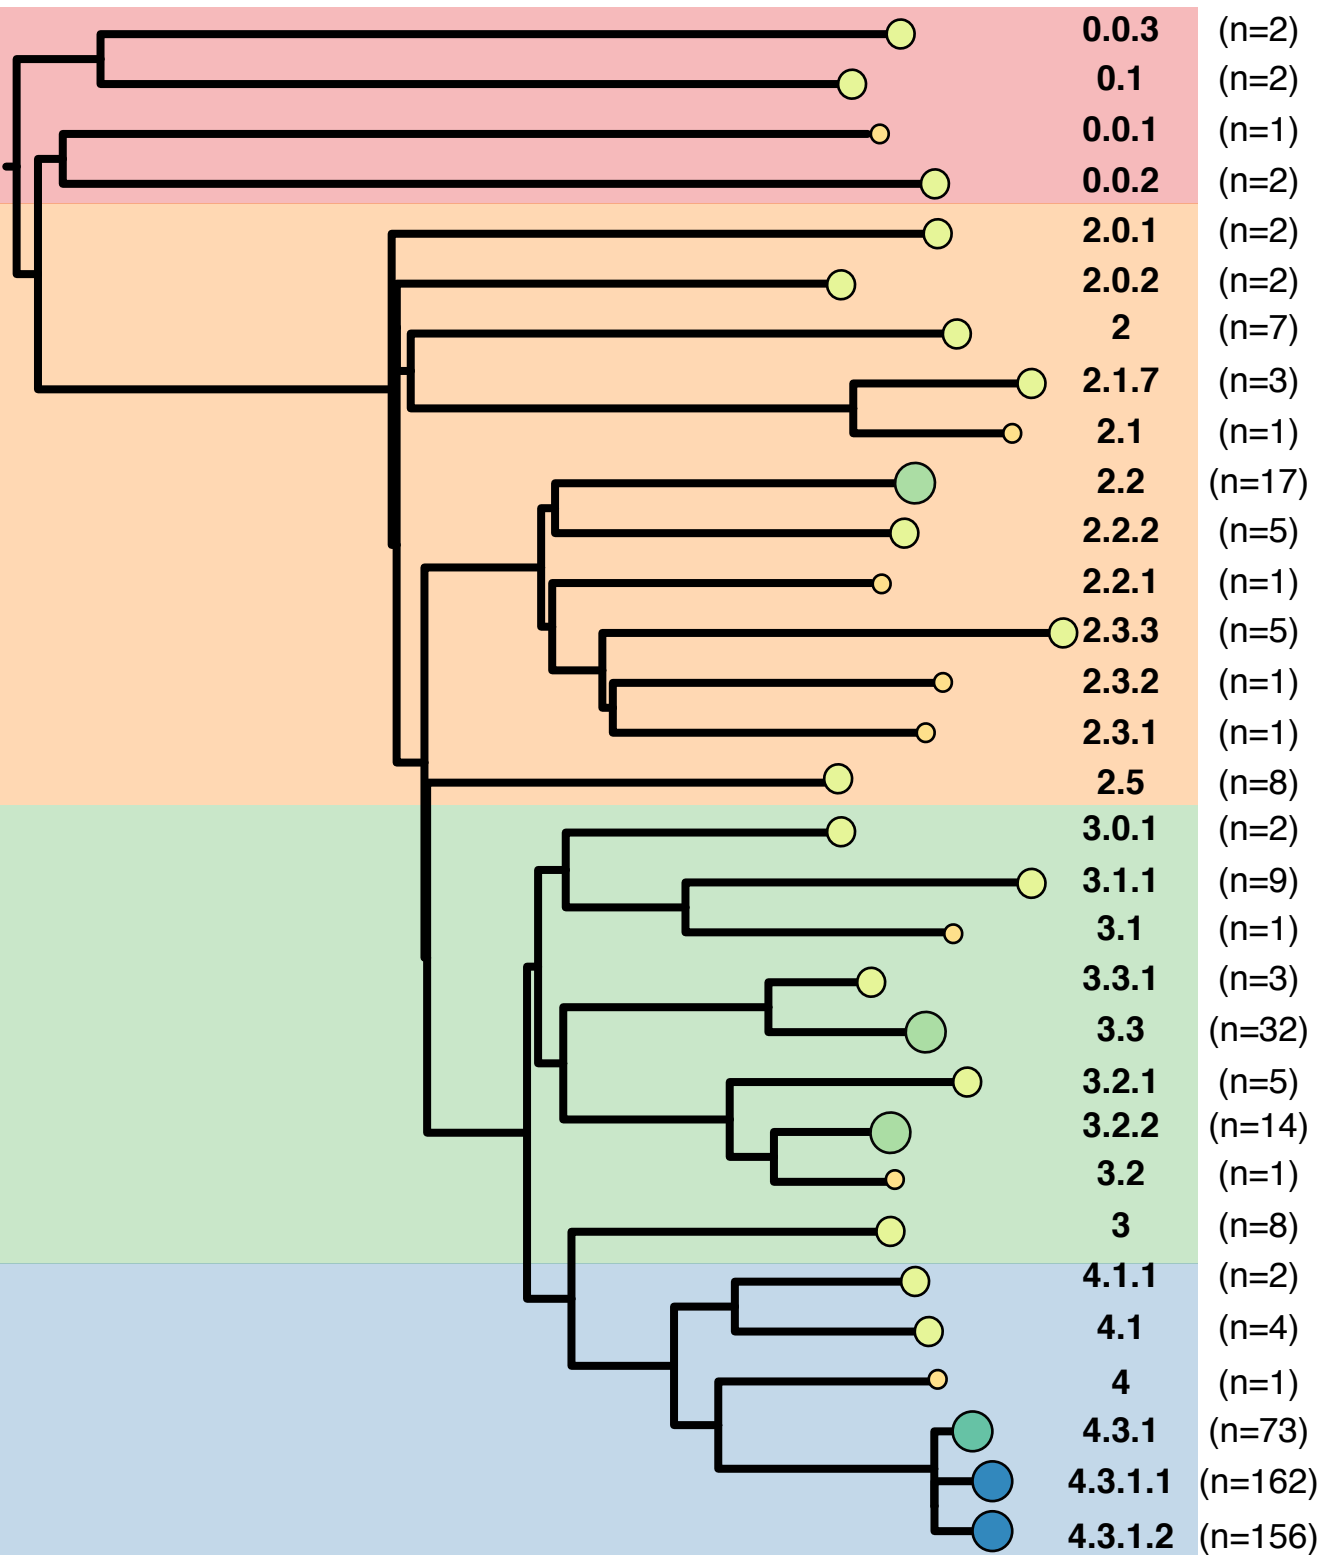**b**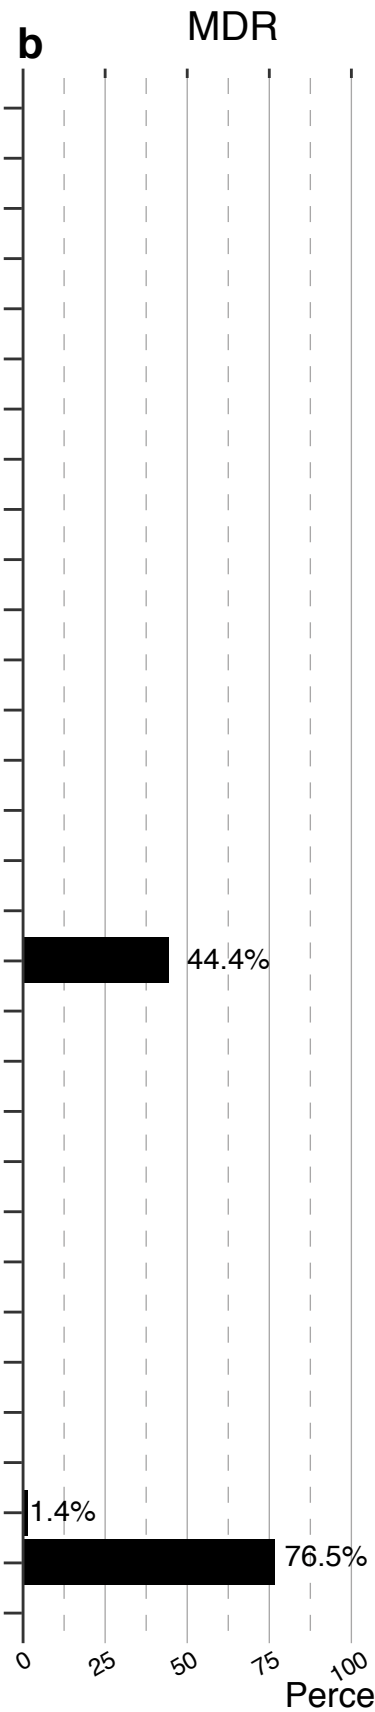**c**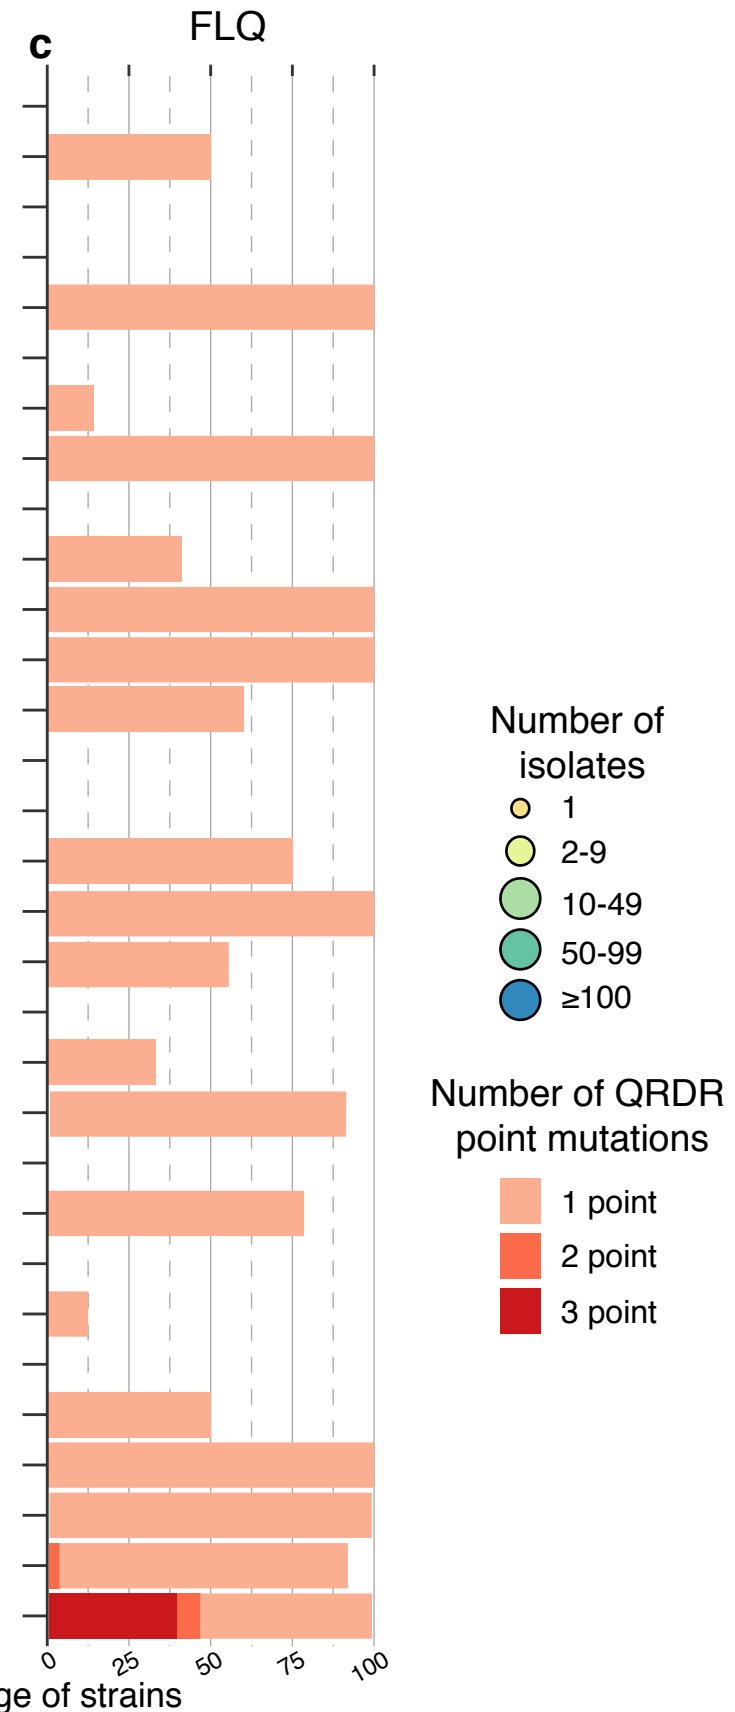

Number of isolates

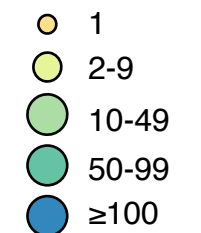

Number of QRDR point mutations

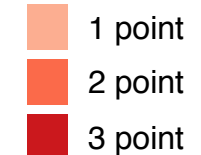

Percentage of strains

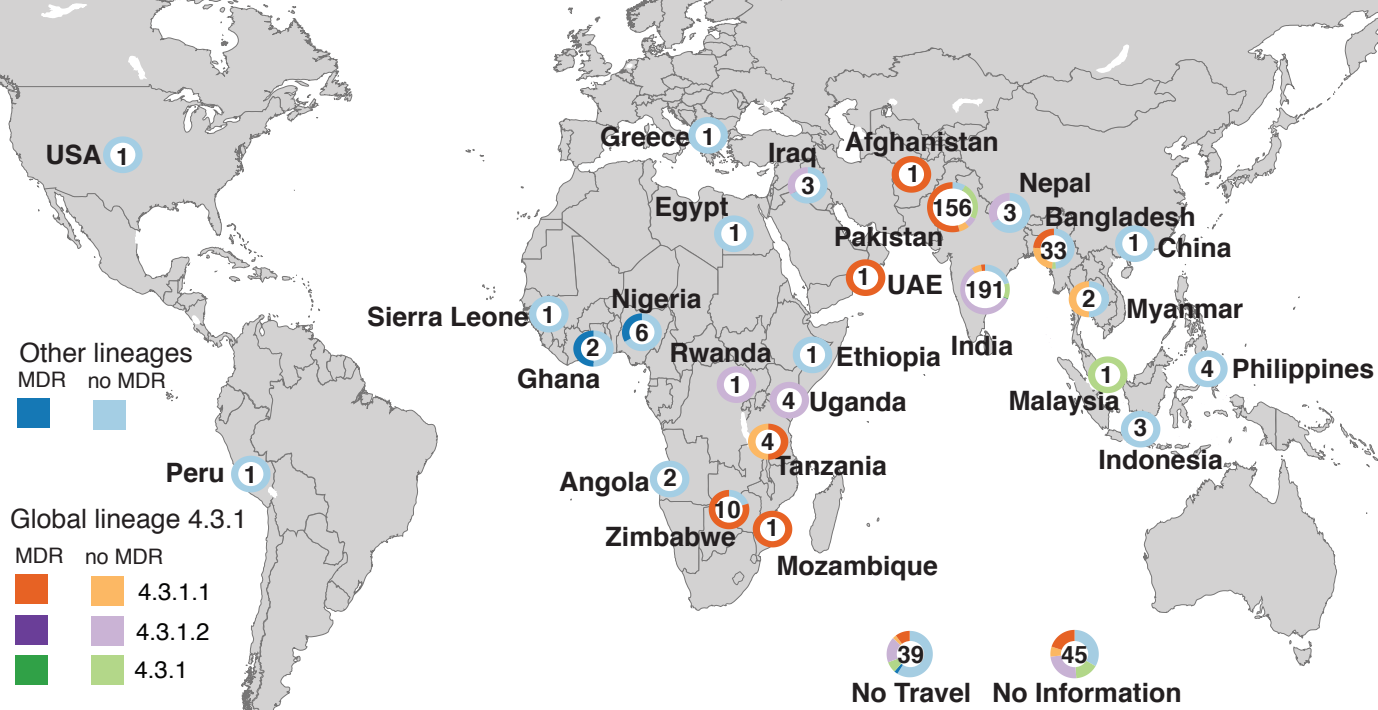

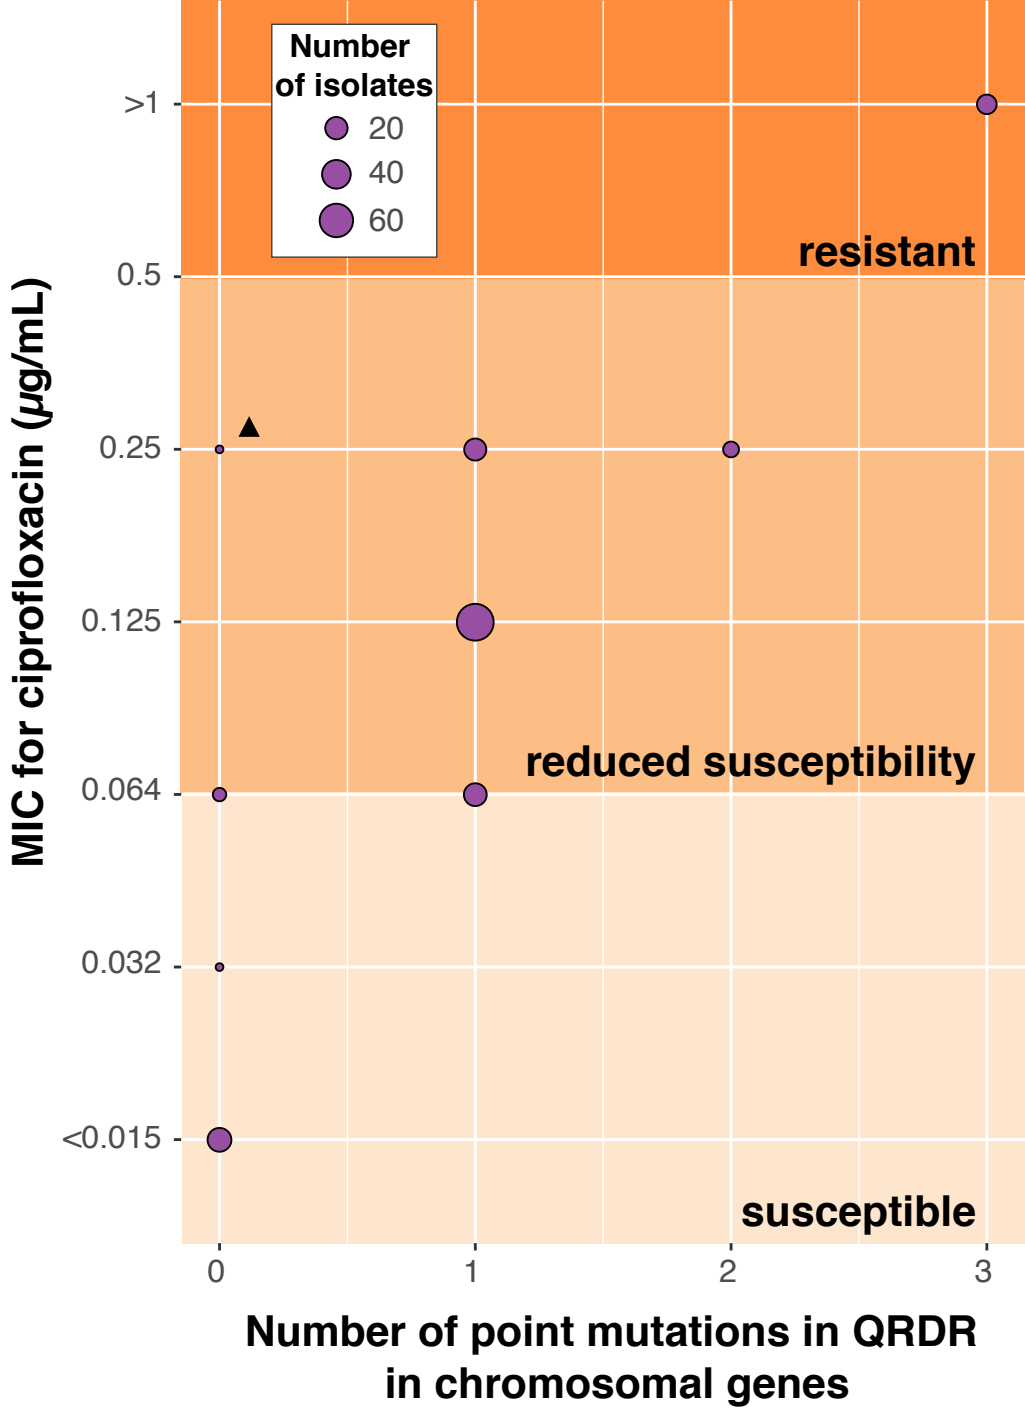

## a MDR composite transposon

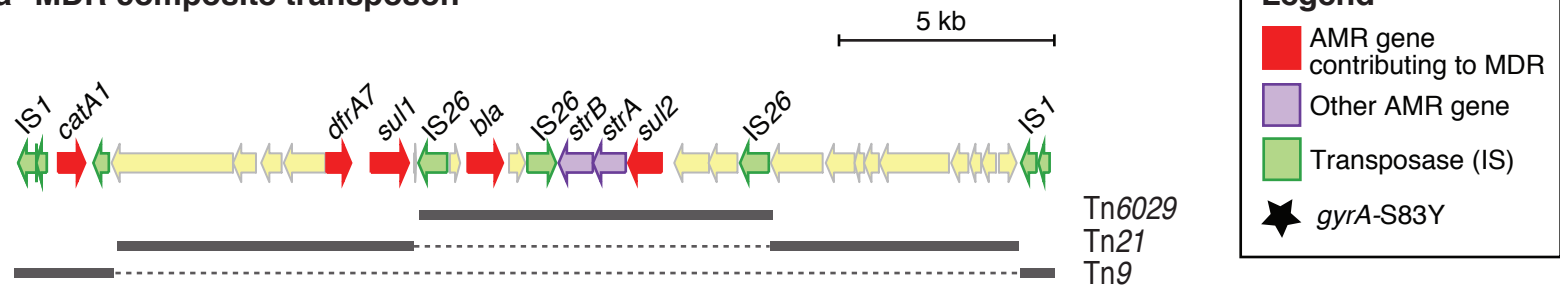

## b IncHI plasmids (PST2)

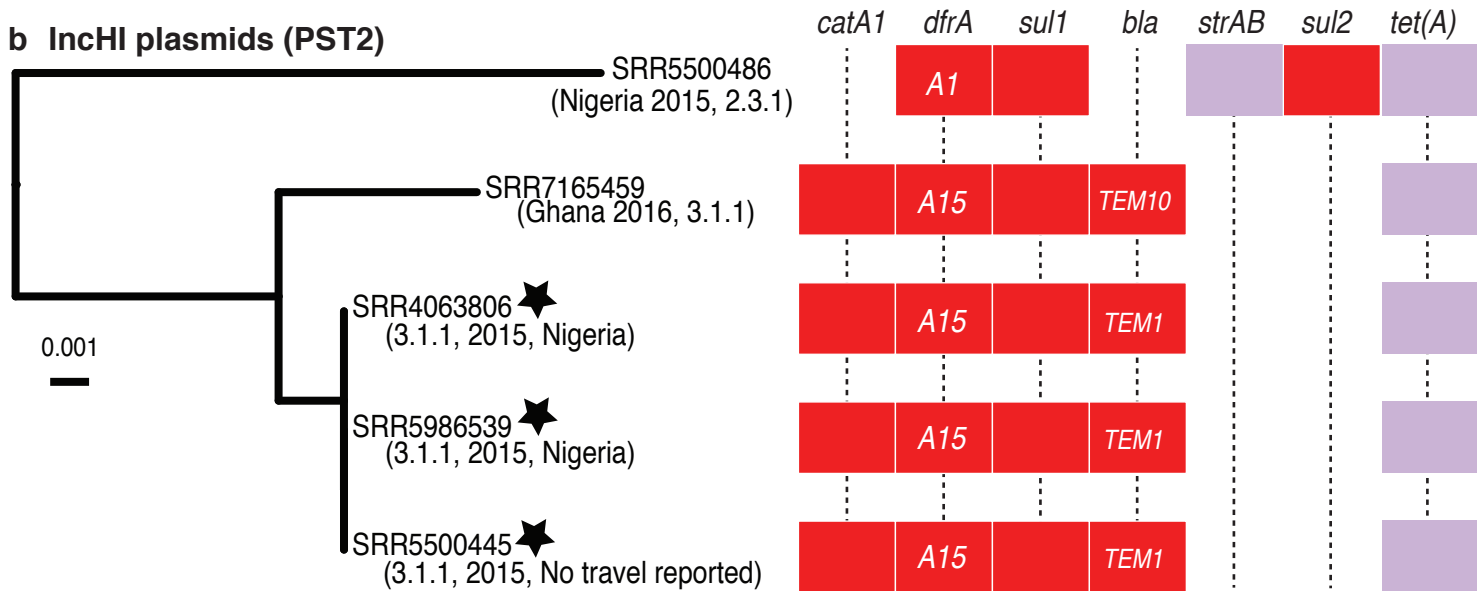

Source: https://www.biorxiv.org/content/10.1101/510461v1.full.pdf
